# Supplementary material
Source: MDPI journal article supplement (https://www.mdpi.com/2311-5521/6/6/225)

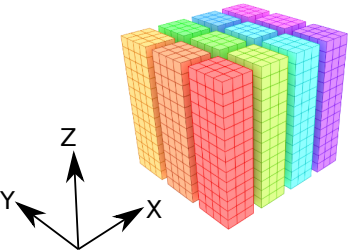

Supplement: s1 [file s1]
